# Supplementary material for: CLINICAL OUTCOMES FOLLOWING EXERCISE REHABILITATION IN PEOPLE WITH MULTIMORBIDITY: A SYSTEMATIC REVIEW
Source: PubMed Central journal article supplement — J Rehabil Med. 2023 Mar 6;55:2551. doi: 10.2340/jrm.v55.2551 (PMC10015470; doi:10.2340/jrm.v55.2551), 2023-03-06
Supplement: JRM-55-2551-s001.pdf [file JRM-55-2551-s001.pdf]

Supplementary material has been published as submitted. It has not been copyedited, typeset or checked for scientific content by Journal of Rehabilitation Medicine

**Table SI. Search strategy for Medline.**

---

Comorbidity/ OR comorbid\* OR co-morbid\*

Multimorbidity OR multimorbid\* OR multi-morbid\* OR multidisease\* OR multi-disease\*

1 OR 2

Exercise/ OR exercise

Rehabilitation/ OR rehab\*

Exercise therapy/ OR “exercise therap\*”

4 OR 5 OR 6

3 AND 7

---

Note: All searches were limited to English and human

**Table SII. Intervention details (n = 38).**

| Study                | Intervention                                                                                                                                              | Other interventions                          | Frequency (sessions/week)            | Duration of Rehabilitation                         | Duration of session (minutes)                                       | Intensity                                                                | Supervision (exercise)                  | Location                    |
|----------------------|-----------------------------------------------------------------------------------------------------------------------------------------------------------|----------------------------------------------|--------------------------------------|----------------------------------------------------|---------------------------------------------------------------------|--------------------------------------------------------------------------|-----------------------------------------|-----------------------------|
| Abdelbasset 2019(1)  | Int 1 = treadmill walking                                                                                                                                 | Nil                                          | 3                                    | 12 weeks                                           | 20-40                                                               | Int 1 = 40-70% max HR                                                    | NS                                      | Hospital-based              |
|                      | Int 2 = treadmill walking                                                                                                                                 | Nil                                          | 3                                    | 12 weeks                                           | 30                                                                  | Int 2 = 60-70% max HR                                                    |                                         |                             |
|                      | Com = usual medical care                                                                                                                                  | Nil                                          |                                      |                                                    |                                                                     |                                                                          |                                         |                             |
| Abd El-Kader 2013(2) | Int = exercise training: treadmill; basic physical fitness movements (running, jumping & playing with medicine ball)                                      | Diet regime & medical treatment              | 4                                    | 8 weeks                                            | 15-35                                                               | Treadmill: 60-80% max HR                                                 | Physical education expert               | NS                          |
|                      | Com = usual medical care                                                                                                                                  | Nil                                          |                                      |                                                    |                                                                     |                                                                          |                                         |                             |
| Al-Jiffri 2013(3)    | Int = aerobic exercise training: treadmill                                                                                                                | Prescribed low-calorie diet                  | 3                                    | 3 months                                           | 30                                                                  | 65-75% max HR                                                            | NS                                      | NS                          |
|                      | Com = prescribed low-calorie diet                                                                                                                         | Nil                                          |                                      |                                                    |                                                                     |                                                                          |                                         |                             |
| Barnes 2009(4)       | Int = aerobic & resistance exercise: combination of cycling, walking and jogging; resistance exercises – 7 exercises for upper & lower limb muscle groups | Very low-energy diet (with meal replacement) | 3 (resistance)<br>And<br>5 (aerobic) | 16 weeks (resistance)<br>And<br>12 weeks (aerobic) | 3 sets of 12 repetitions (resistance)<br>And<br>40 (aerobic)        | 80% (resistance)<br>And<br>80% VO <sub>2</sub> peak (aerobic)            | Exercise physiologist & physiotherapist | Hospital-based & home-based |
|                      | Com = N/A                                                                                                                                                 |                                              |                                      |                                                    |                                                                     |                                                                          |                                         |                             |
|                      |                                                                                                                                                           |                                              |                                      |                                                    |                                                                     |                                                                          |                                         |                             |
| Beaudoin 2017(5)     | Int = aerobic & resistance exercise: walking, jogging, cycling or elliptical trainer; resistance exercises – 5-7 exercises for large muscle groups        | Nil                                          | 3                                    | 12 weeks                                           | 20-40 (aerobic)<br>And<br>1-3 sets of 8-15 repetitions (resistance) | 60-80% VO <sub>2</sub> peak (aerobic)<br>And<br>30-50% 1-RM (resistance) | NS                                      | Hospital-based              |
|                      | Com = usual medical care                                                                                                                                  | Nil                                          |                                      |                                                    |                                                                     |                                                                          |                                         |                             |
|                      |                                                                                                                                                           |                                              |                                      |                                                    |                                                                     |                                                                          |                                         |                             |

|                        |                                                                                                                                                                                                                                                                                             |                                 |                                         |                       |                                                             |                                                                                                    |                       |                             |
|------------------------|---------------------------------------------------------------------------------------------------------------------------------------------------------------------------------------------------------------------------------------------------------------------------------------------|---------------------------------|-----------------------------------------|-----------------------|-------------------------------------------------------------|----------------------------------------------------------------------------------------------------|-----------------------|-----------------------------|
| Bernocchi<br>2018(6)   | Int = exercise: mini-ergometer, callisthenic exercises, free walking OR mini-ergometer, muscle reinforcement exercises (with weights), free walking<br><br>Com = usual medical care                                                                                                         | Education<br><br>Nil            | 3-7<br><br>Nil                          | 4 months              | 45-55<br>(aerobic)<br>And<br>30-40<br>(resistance)          | Moderate or high level of dyspnoea on Borg scale                                                   | Physiotherapist       | Home-based                  |
| Byrkjeland<br>2015(7)  | Int = aerobic & resistance exercise: supervised - alternating between: circuit training/interval training (uphill walking or step)/spinning [resistance components used free weights]; home - walking/swimming/cycling/cross-country skiing<br><br>Com = control group (usual care with GP) | Nil<br><br>Nil                  | 2 (supervised)<br>And<br>1 (home-based) | 12 months             | 60 (duration of class)<br>10-15 repetitions<br>(resistance) | High intensity: RPE ≥ 15 (5-15 minutes)<br>And<br>Moderate intensity: RPE = 12-14 (remaining time) | Qualified instructors | Hospital-based & home-based |
| Castro<br>2015(8)      | Int = aerobic & resistance exercise: cycle-ergometer or treadmill; resistance - elastic bands and dumbbells<br><br>Com = N/A                                                                                                                                                                | Haemodialysis                   | 3                                       | 16 weeks              | 20 (aerobic)<br>And<br>20<br>(resistance)                   | NS (aerobic & resistance)                                                                          | NS                    | Hospital-based              |
| Chiang<br>2020(9)      | Int = aerobic exercise: brisk walking, jogging, stationary ergometer exercise; individual session of physical activity promotion<br><br>Com = individual session of physical activity promotion                                                                                             | Nil                             | 3                                       | 12 weeks              | 30                                                          | 70% HRR                                                                                            | NS                    | Home-based                  |
| Collins<br>2010(10)    | Int = home-based walking program<br><br>Com = bi-weekly phone call                                                                                                                                                                                                                          | Bi-weekly phone call<br><br>Nil | 3 (minimum)                             | 6 months              | 50                                                          | NS                                                                                                 | Exercise instructor   | Home-based                  |
| Crisafulli<br>2010(11) | Int = pulmonary rehabilitation (peripheral limb training)                                                                                                                                                                                                                                   | Educational sessions, chest     | 3                                       | 21 sessions (9 weeks) |                                                             | NS                                                                                                 | Physiotherapist       | Hospital-based              |

physiotherapy, and psychological and nutritional counselling when indicated

180 (specific duration of exercise NS)

Com = N/A

|                      |                                                                                                                                                                                                                                                                                |                               |                      |                            |                     |                                                  |                                                    |                             |
|----------------------|--------------------------------------------------------------------------------------------------------------------------------------------------------------------------------------------------------------------------------------------------------------------------------|-------------------------------|----------------------|----------------------------|---------------------|--------------------------------------------------|----------------------------------------------------|-----------------------------|
| de Groot<br>2012(12) | Int = aerobic & strengthening exercise: free-walking, treadmills, stationary cycling or elliptical machines; resistance exercises – sit-to-stand, single-arm curl, shoulder press, wall push-ups, side bends & forwards lunges (using body weight or commonly available items) | Cognitive behavioural therapy | 150 minutes per week | 12 weeks                   | 20-30 (aerobic)     | 55-75% HRR                                       | Exercise physiologist & community fitness director | Community exercise facility |
|                      |                                                                                                                                                                                                                                                                                |                               |                      | And 4-6 weeks (resistance) | And NS (resistance) | And Appropriate intensities using the RPE method |                                                    |                             |

Com = N/A

|                     |                                                                                                                                                                     |                                                                                |   |          |                                           |                                       |                 |                |
|---------------------|---------------------------------------------------------------------------------------------------------------------------------------------------------------------|--------------------------------------------------------------------------------|---|----------|-------------------------------------------|---------------------------------------|-----------------|----------------|
| Freitas<br>2018(13) | Int = aerobic & resistance exercise: treadmill, bike or elliptical machine; resistance - targeting major muscle groups (pectoral, deltoid, quadriceps & hamstrings) | Education and diet regime (low-calorie) with nutritionist & psychologist input | 2 | 3 months | NS (aerobic)                              | 50-75% VO <sub>2</sub> peak (aerobic) | Physiotherapist | Hospital-based |
|                     |                                                                                                                                                                     |                                                                                |   |          | And 2 sets of 10 repetitions per exercise | And 50-70% 1-RM (resistance)          |                 |                |

|  |                                                                                                                                                                                                                                                 |                                                                                 |   |          |                            |                                      |    |    |
|--|-------------------------------------------------------------------------------------------------------------------------------------------------------------------------------------------------------------------------------------------------|---------------------------------------------------------------------------------|---|----------|----------------------------|--------------------------------------|----|----|
|  | Com = sham exercise: breathing (based on yoga's pranayama breathing exercises) & stretches - targeting major muscle groups: (trapezius, pectoralis, gluteus, hamstrings, quadriceps femoris, paraspinal, latissimus dorsi, and pubis adductors) | Education and diet regimen (low-calorie) with nutritionist & psychologist input | 2 | 3 months | NS (breathing)             | no intensity progression (breathing) | NS | NS |
|  |                                                                                                                                                                                                                                                 |                                                                                 |   |          | And 10 seconds per stretch | And no progression (stretches)       |    |    |

|                     |                                                                                                                                                                  |     |   |           |    |                                         |                                                                            |                             |
|---------------------|------------------------------------------------------------------------------------------------------------------------------------------------------------------|-----|---|-----------|----|-----------------------------------------|----------------------------------------------------------------------------|-----------------------------|
| Halvari<br>2017(14) | Int = aerobic & resistance exercise: spinning classes; endurance & resistance circuit training; interval training – uphill walking/jogging; weight room training | Nil | 3 | 12 months | 60 | High intensity: RPE ≥ 15 (5-15 minutes) | Students with Masters degrees from the Norwegian School of Sports Sciences | Hospital-based & home-based |
|---------------------|------------------------------------------------------------------------------------------------------------------------------------------------------------------|-----|---|-----------|----|-----------------------------------------|----------------------------------------------------------------------------|-----------------------------|

|                                                                                        |                                                                                                                                                                                                                                                                                         |              |         |                                        |                                                                                                  | Moderate intensity:<br>RPE = 12-14<br>(remaining time)                                   |                       |                |  |                   |
|----------------------------------------------------------------------------------------|-----------------------------------------------------------------------------------------------------------------------------------------------------------------------------------------------------------------------------------------------------------------------------------------|--------------|---------|----------------------------------------|--------------------------------------------------------------------------------------------------|------------------------------------------------------------------------------------------|-----------------------|----------------|--|-------------------|
| Com = usual physical activity                                                          |                                                                                                                                                                                                                                                                                         | Nil          |         |                                        |                                                                                                  |                                                                                          |                       |                |  |                   |
| Hassan<br>2016(15)                                                                     | Int = pulmonary rehabilitation (exercise training targeting upper & lower limbs); treadmill (interval training); resistance - free weights                                                                                                                                              | Education    | 3       | 8 weeks                                | NS (aerobic)<br>And<br>30 repetitions<br>(resistance)                                            | 60-80% max HR<br>(aerobic)<br>And<br>According to<br>patient's tolerance<br>(resistance) | NS                    |                |  | NS                |
| Com = N/A                                                                              |                                                                                                                                                                                                                                                                                         |              |         |                                        |                                                                                                  |                                                                                          |                       |                |  |                   |
| Hsu<br>2021(16)                                                                        | Int = resistance exercise (elastic band open chain exercises for lower limb muscles)                                                                                                                                                                                                    | Diet control | 3       | 12 weeks                               | 10<br>repetitions/5<br>sets                                                                      | RM 10 and RPE 13                                                                         | Clinical staff        |                |  | Home-based        |
| Int 2 = resistance exercise (elastic band open chain exercises for lower limb muscles) |                                                                                                                                                                                                                                                                                         | Nil          | 3       |                                        |                                                                                                  |                                                                                          |                       |                |  |                   |
| Com = Diet control                                                                     |                                                                                                                                                                                                                                                                                         |              |         |                                        |                                                                                                  |                                                                                          |                       |                |  |                   |
|                                                                                        |                                                                                                                                                                                                                                                                                         | Nil          |         |                                        |                                                                                                  |                                                                                          |                       |                |  |                   |
| Johnson<br>2014(17)                                                                    | Int = aquatic exercise program – details not described                                                                                                                                                                                                                                  | NS           | NS      | 12 weeks                               | NS                                                                                               | NS                                                                                       | NS                    |                |  | Community-based   |
| Com = NS                                                                               |                                                                                                                                                                                                                                                                                         |              |         |                                        |                                                                                                  |                                                                                          |                       |                |  |                   |
| Khadanga<br>2016(18)                                                                   | Int = cardiac rehabilitation (aerobic & resistance exercise): treadmill and arm ergometer, stepper, trampoline or rower; resistance – 6 exercises (leg extension, leg curl, bench press, shoulder press, lateral pulldown & bicep curl), using weight-lifting equipment or free weights | Education    | Up to 3 | 3-4 months<br>(maximum 36<br>sessions) | 45-60<br>(aerobic &<br>resistance<br>combined)<br>10 repetitions<br>per exercise<br>(resistance) | 70-85% max HR<br>(aerobic)<br>And<br>50% 1-RM<br>(resistance)                            | Cardiac<br>specialist | rehabilitation |  | Medical<br>centre |
| Com = N/A                                                                              |                                                                                                                                                                                                                                                                                         |              |         |                                        |                                                                                                  |                                                                                          |                       |                |  |                   |

|                       |                                                                                                                                                                                                                                                                                             |                                          |     |                |                                                                                    |                                                                                                 |                       |                |
|-----------------------|---------------------------------------------------------------------------------------------------------------------------------------------------------------------------------------------------------------------------------------------------------------------------------------------|------------------------------------------|-----|----------------|------------------------------------------------------------------------------------|-------------------------------------------------------------------------------------------------|-----------------------|----------------|
| Kurian<br>2010(19)    | Int = resistance exercise training – details not described                                                                                                                                                                                                                                  | NS                                       | NS  | 12 weeks       | NS                                                                                 | NS                                                                                              | NS                    | NS             |
|                       | Com = N/A                                                                                                                                                                                                                                                                                   |                                          |     |                |                                                                                    |                                                                                                 |                       |                |
| Listerman<br>2011(20) | Int = cardiac rehabilitation (aerobic & resistance exercise): details not described                                                                                                                                                                                                         | Individual counselling & group education | 2-3 | 24-36 sessions | 60                                                                                 | Each participant was given an individualized prescription based on baseline functional capacity | NS                    | Medical centre |
|                       | Com = N/A                                                                                                                                                                                                                                                                                   |                                          |     |                |                                                                                    |                                                                                                 |                       |                |
| Lo 2021(21)           | Int = aerobic exercise: cycle ergometry                                                                                                                                                                                                                                                     | MI                                       | 3-5 | 12 weeks       | 30-50                                                                              | 50-80% HRR                                                                                      | Physiotherapist/nurse | Hospital-based |
|                       | Com 1 = MI                                                                                                                                                                                                                                                                                  |                                          |     |                |                                                                                    |                                                                                                 |                       |                |
|                       | Com 2 = usual care                                                                                                                                                                                                                                                                          | Nil                                      |     |                |                                                                                    |                                                                                                 |                       |                |
| Martin<br>2016(22)    | Int = cardiac rehabilitation (exercise-based program): details not described                                                                                                                                                                                                                | NS                                       | NS  | 12 weeks       | NS                                                                                 | NS                                                                                              | NS                    | NS             |
|                       | Com = N/A                                                                                                                                                                                                                                                                                   |                                          |     |                |                                                                                    |                                                                                                 |                       |                |
| McNamara<br>2013(23)  | Int 1 = land-based exercise (aerobic & resistance): upper & lower limb aerobic exercises (punching, kicking, stationary marching, walking: treadmill or free-walking, stationary cycling); upper & lower limb & thoracic cage stretches; resistance exercises – 3 unsupported arm exercises | Nil                                      | 3   | 8 weeks        | 60 (aerobic & resistance combined)<br>And<br>3 sets of 10 repetitions (resistance) | 80% average speed (walking)<br>And<br>3-5 on modified Borg Scale (0-10) for dyspnoea & RPE      | Physiotherapist       | Hospital-based |
|                       | Int 2 = water-based exercise (aerobic & resistance): upper & lower limb aerobic exercises (extensive variety of exercises); upper & lower limb & thoracic cage stretches; resistance exercises – 3 unsupported arm exercises                                                                | Nil                                      | 3   | 8 weeks        | 60 (aerobic & resistance combined)<br>And<br>3 sets of 10 repetitions (resistance) | 3-5 on modified Borg Scale (0-10) for dyspnoea & RPE                                            | Physiotherapist       |                |



|                       |                                                                                                                                                                                                                 |                                                   |                                                                                                                    |             |                                                                                              |                                                                                                                                                                                                                                                                                                                        |                                 |                  |
|-----------------------|-----------------------------------------------------------------------------------------------------------------------------------------------------------------------------------------------------------------|---------------------------------------------------|--------------------------------------------------------------------------------------------------------------------|-------------|----------------------------------------------------------------------------------------------|------------------------------------------------------------------------------------------------------------------------------------------------------------------------------------------------------------------------------------------------------------------------------------------------------------------------|---------------------------------|------------------|
| Nonoyama<br>2016(28)  | Int = cardiac rehabilitation (aerobic & resistance exercise): walking; resistance exercises - lower & upper body & trunk-stabilizing exercises<br>Com = N/A                                                     | Education and psychological & dietary counselling | 1 per week (6-12 months)<br>And<br>1 per month (4-12 months)                                                       | 6-12 months | 90 (duration of class)<br>60 maximum (aerobic)<br>And<br>10-15 repetitions (resistance)      | 60-80% VO <sub>2</sub> peak (aerobic)<br>And<br>NS (resistance)                                                                                                                                                                                                                                                        | Physiotherapist & kinesiologist | Hospital - based |
| Servantes<br>2012(29) | Int 1 = aerobic training: walking<br><br>Int 2 = aerobic & resistance training: walking; resistance exercises – 3 exercises for upper limb & 4 exercises for lower limb (free weights)<br>Com = untrained group | Education                                         | 3 (first and second months)<br>And<br>4 (third month)<br><br>3 (first and second months)<br>And<br>4 (third month) | 3 months    | 30-45<br><br>30-45 (aerobic)<br>And<br>1 set of 12-16 repetitions each exercise (resistance) | Borg exertion scale (0-15) to evaluate intensity<br>Heart rate levels that correspond to anaerobic threshold (10 heart rates up & down)<br><br>Borg exertion scale (0-15) to evaluate intensity<br>Heart rate levels that correspond to anaerobic threshold (10 heart rates up & down)<br>And 30-40% 1-RM (resistance) | Physiotherapist                 | Home-based       |
| Soleimani<br>2009(30) | Int = cardiac rehabilitation (aerobic exercise): treadmill<br>Com = N/A                                                                                                                                         | Psychological & dietary counselling               | 3                                                                                                                  | 8 weeks     | 20                                                                                           | Intensity of exercise was patient dependent: no                                                                                                                                                                                                                                                                        | Physical therapist              | Hospital-based   |



|                        |                                                                                                                                             |                                                            |                                                                                        |                    |                                   | NS                                                          | NS                    | NS | NS |
|------------------------|---------------------------------------------------------------------------------------------------------------------------------------------|------------------------------------------------------------|----------------------------------------------------------------------------------------|--------------------|-----------------------------------|-------------------------------------------------------------|-----------------------|----|----|
|                        |                                                                                                                                             |                                                            |                                                                                        |                    |                                   | NS                                                          | NS                    | NS | NS |
| Sridhar<br>2010(31)    | Int = aerobic exercise: treadmill or cycling<br>Com = no exercise                                                                           | Nil<br>Nil                                                 | 5                                                                                      | 12 months          | 30                                | NS                                                          | NS                    | NS | NS |
|                        |                                                                                                                                             |                                                            |                                                                                        |                    |                                   | NS                                                          | NS                    | NS | NS |
| Srinivasan<br>2014(32) | Int = Tai Chi<br>Com = mind-body education                                                                                                  | Antidepressant<br>Antidepressant<br>treatment<br>treatment | 2<br>2                                                                                 | 8 weeks<br>8 weeks | 60<br>60                          | NS                                                          | NS                    | NS | NS |
|                        |                                                                                                                                             |                                                            |                                                                                        |                    |                                   | NS                                                          | NS                    | NS | NS |
| Takaya<br>2014(33)     | Int = cardiac rehabilitation: walking, cycling &<br>calisthenics<br>Com = N/A<br>Com = N/A                                                  | Education                                                  | 5 (weeks 1-2 = 5<br>& remaining 10<br>weeks = 2<br>supervised session<br>& home-based) | 3 months           | 30-60                             | 50-60%<br>(aerobic)<br>Or<br>12-13 Borg RPE<br>scale (6-20) | HRR                   | NS | NS |
|                        |                                                                                                                                             |                                                            |                                                                                        |                    |                                   | NS                                                          | NS                    | NS | NS |
| Tunsupon<br>2017(34)   | Int = pulmonary rehabilitation: treadmill;<br>stationary cycle; stretching; light floor<br>exercises (with or without weights)<br>Com = N/A | Nil                                                        | 3                                                                                      | 8 weeks            | 90 (duration<br>of class)         | NS                                                          | NS                    | NS | NS |
|                        |                                                                                                                                             |                                                            |                                                                                        |                    |                                   | NS                                                          | NS                    | NS | NS |
| Verges<br>2004(35)     | Int = cardiac rehabilitation: treadmill, cycle<br>and arm ergo<br>Com = N/A                                                                 | Education                                                  | 3                                                                                      | 2 months           | 60                                | 65-80% max HR<br>And<br>13-15 Borg RPE<br>scale             | Exercise physiologist | NS | NS |
|                        |                                                                                                                                             |                                                            |                                                                                        |                    |                                   | NS                                                          | NS                    | NS | NS |
| Wang<br>2013(36)       | Int = aerobic interval training: bicycle<br>ergometer<br>Com = N/A                                                                          | Nil                                                        | 3                                                                                      | 12 weeks           | 15 (5, 3-<br>minute<br>intervals) | 80% VO <sub>2</sub> peak                                    | NS                    | NS | NS |
|                        |                                                                                                                                             |                                                            |                                                                                        |                    |                                   | NS                                                          | NS                    | NS | NS |
| Woodard<br>1994(37)    | Int = cardiac rehabilitation: walking or<br>stationary cycling                                                                              | Nil                                                        | 3                                                                                      | 6 months           | 45                                | 50-85% symptom-<br>limited HRR                              | NS                    | NS | NS |

---

Com = N/A

---

|                     |                                                                                  |                            |                               |          |    |    |    |                              |
|---------------------|----------------------------------------------------------------------------------|----------------------------|-------------------------------|----------|----|----|----|------------------------------|
| Zwerink<br>2010(38) | Int = exercise program: cycling; walking; lifting; functional strength exercises | 2 self-management sessions | 2 (community-physio practice) | 10 weeks | NS | NS | NS | Community-based & home-based |
|                     | Com = N/A                                                                        |                            | And<br>1 (home-based)         |          |    |    |    |                              |

---

Int = intervention; Com = comparison; max = maximum; HR = heart rate; NS = not stated; N/A = not applicable; RM = repetition maximum; VO<sub>2</sub> peak = peak oxygen consumption; GP = general practitioner; RPE = rating of perceived exertion; HRR = heart rate reserve; MI - motivational interviewing; 6MWT = 6-minute walk test

**Table SIII. Quality assessment – Randomized Controlled Trials and Randomized Crossover Trial**

| Study           | Random allocation | Concealed allocation | Groups similar at baseline | Participant blinding | Therapist blinding | Assessor blinding | Groups treated identically other than intervention | Follow up complete | Analysed in group randomized to | Outcomes measured in same way | Outcomes measured in a reliable way | Appropriate statistical analysis | Appropriate trial design for RCT |
|-----------------|-------------------|----------------------|----------------------------|----------------------|--------------------|-------------------|----------------------------------------------------|--------------------|---------------------------------|-------------------------------|-------------------------------------|----------------------------------|----------------------------------|
| Abdelbasset(1)  | UC                | UC                   | Y                          | N                    | UC                 | UC                | Y                                                  | Y                  | Y                               | Y                             | Y                                   | Y                                | Y                                |
| Abd El-Kader(2) | UC                | UC                   | Y                          | N                    | UC                 | UC                | Y                                                  | Y                  | UC                              | Y                             | Y                                   | Y                                | Y                                |
| Al-Jiffiri(3)   | UC                | UC                   | UC                         | N                    | N                  | UC                | Y                                                  | Y                  | Y                               | Y                             | Y                                   | Y                                | UC                               |
| Beaudion(5)     | Y                 | N                    | Y                          | N                    | N                  | UC                | Y                                                  | Y                  | Y                               | Y                             | Y                                   | Y                                | Y                                |
| Bernocchi(6)    | Y                 | N                    | N                          | N                    | N                  | UC                | Y                                                  | Y                  | Y                               | Y                             | UC                                  | Y                                | Y                                |
| Byrkjeland(7)   | Y                 | Y                    | Y                          | N                    | N                  | Y                 | Y                                                  | Y                  | Y                               | Y                             | Y                                   | Y                                | Y                                |
| Chiang(9)       | Y                 | Y                    | N                          | N                    | UC                 | Y                 | Y                                                  | Y                  | Y                               | Y                             | Y                                   | Y                                | Y                                |
| Collins(10)     | UC                | UC                   | Y                          | N                    | N                  | UC                | Y                                                  | UC                 | UC                              | UC                            | UC                                  | Y                                | UC                               |
| Freitas(13)     | Y                 | Y                    | Y                          | Y                    | N                  | Y                 | Y                                                  | Y                  | Y                               | Y                             | Y                                   | Y                                | Y                                |
| Halvari(14)     | Y                 | Y                    | N                          | N                    | N                  | UC                | Y                                                  | Y                  | Y                               | Y                             | Y                                   | Y                                | Y                                |
| Hsu(16)         | Y                 | Y                    | Y                          | Y                    | UC                 | UC                | Y                                                  | Y                  | Y                               | Y                             | Y                                   | Y                                | Y                                |
| Johnson(17)     | UC                | UC                   | UC                         | N                    | N                  | UC                | UC                                                 | UC                 | UC                              | UC                            | UC                                  | UC                               | UC                               |
| Lo(21)          | UC                | UC                   | Y                          | UC                   | UC                 | UC                | Y                                                  | Y                  | Y                               | Y                             | Y                                   | Y                                | Y                                |
| McNamara(23)    | Y                 | Y                    | Y                          | N                    | N                  | Y                 | Y                                                  | Y                  | Y                               | Y                             | Y                                   | Y                                | Y                                |
| Mentz(24)       | Y                 | Y                    | N                          | N                    | N                  | Y                 | Y                                                  | Y                  | Y                               | Y                             | Y                                   | Y                                | Y                                |
| Servantes(29)   | Y                 | Y                    | Y                          | N                    | N                  | Y                 | Y                                                  | Y                  | Y                               | Y                             | Y                                   | Y                                | Y                                |
| Sridhar(31)     | UC                | UC                   | Y                          | N                    | N                  | UC                | Y                                                  | Y                  | Y                               | Y                             | Y                                   | Y                                | Y                                |
| Srinivasan(32)  | UC                | UC                   | Y                          | N                    | N                  | UC                | UC                                                 | Y                  | Y                               | Y                             | Y                                   | UC                               | UC                               |

Y = yes; N = no; UC = unclear

**Table SIV. Quality assessment – cohort studies.**

| <b>Study</b>   | <b>Groups similar &amp; recruited from same population</b> | <b>Exposures measured similarly in both groups</b> | <b>Exposures measured in a valid &amp;reliable way</b> | <b>Identified confounding factors</b> | <b>Strategies to deal with confounding factors</b> | <b>Groups/participants free of outcome at start</b> | <b>Outcomes measured in a valid &amp;reliable way</b> | <b>Follow up time reported &amp; sufficient</b> | <b>Follow up complete &amp; reasons why not</b> | <b>Strategies for incomplete follow up</b> | <b>Appropriate statistical analysis</b> |
|----------------|------------------------------------------------------------|----------------------------------------------------|--------------------------------------------------------|---------------------------------------|----------------------------------------------------|-----------------------------------------------------|-------------------------------------------------------|-------------------------------------------------|-------------------------------------------------|--------------------------------------------|-----------------------------------------|
| Barnes(4)      | NA                                                         | NA                                                 | Y                                                      | Y                                     | N                                                  | NA                                                  | Y                                                     | Y                                               | N                                               | NA                                         | Y                                       |
| Castro(8)      | NA                                                         | NA                                                 | Y                                                      | N                                     | N                                                  | NA                                                  | Y                                                     | Y                                               | N                                               | N                                          | UC                                      |
| Crisafulli(11) | NA                                                         | NA                                                 | Y                                                      | NA                                    | NA                                                 | NA                                                  | Y                                                     | Y                                               | N                                               | N                                          | Y                                       |
| Hassan(15)     | NA                                                         | NA                                                 | Y                                                      | N                                     | NA                                                 | Y                                                   | Y                                                     | Y                                               | Y                                               | N                                          | Y                                       |
| Khadanga(18)   | NA                                                         | Y                                                  | Y                                                      | Y                                     | N                                                  | NA                                                  | Y                                                     | Y                                               | Y                                               | N                                          | Y                                       |
| Kurian(19)     | UC                                                         | UC                                                 | UC                                                     | UC                                    | UC                                                 | UC                                                  | UC                                                    | Y                                               | UC                                              | UC                                         | UC                                      |
| Listerman(20)  | NA                                                         | Y                                                  | Y                                                      | Y                                     | Y                                                  | Y                                                   | Y                                                     | Y                                               | Y                                               | UC                                         | Y                                       |
| Martin(22)     | UC                                                         | UC                                                 | UC                                                     | UC                                    | UC                                                 | UC                                                  | UC                                                    | Y                                               | UC                                              | UC                                         | UC                                      |
| Mesquita(25)   | NA                                                         | NA                                                 | UC                                                     | Y                                     | Y                                                  | Y                                                   | UC                                                    | Y                                               | Y                                               | NA                                         | Y                                       |
| Mundra(26)     | Y                                                          | Y                                                  | UC                                                     | N                                     | N                                                  | Y                                                   | UC                                                    | Y                                               | N                                               | N                                          | UC                                      |
| Naz(27)        | Y                                                          | NA                                                 | Y                                                      | Y                                     | Y                                                  | Y                                                   | Y                                                     | Y                                               | Y                                               | Y                                          | Y                                       |
| Nonoyama(28)   | NA                                                         | NA                                                 | Y                                                      | Y                                     | Y                                                  | Y                                                   | Y                                                     | Y                                               | Y                                               | UC                                         | Y                                       |
| Soleimani(30)  | Y                                                          | Y                                                  | Y                                                      | NA                                    | NA                                                 | Y                                                   | UC                                                    | Y                                               | Y                                               | NA                                         | Y                                       |
| Takaya(33)     | Y                                                          | NA                                                 | Y                                                      | NA                                    | NA                                                 | Y                                                   | Y                                                     | Y                                               | Y                                               | NA                                         | Y                                       |
| Tunsupon(34)   | NA                                                         | NA                                                 | Y                                                      | Y                                     | Y                                                  | Y                                                   | UC                                                    | Y                                               | Y                                               | Y                                          | Y                                       |
| Verges(35)     | Y                                                          | NA                                                 | Y                                                      | NA                                    | NA                                                 | Y                                                   | Y                                                     | Y                                               | Y                                               | NA                                         | Y                                       |
| Wang(36)       | Y                                                          | Y                                                  | Y                                                      | Y                                     | Y                                                  | Y                                                   | Y                                                     | Y                                               | N                                               | N                                          | Y                                       |

|             |    |    |    |   |   |   |    |   |   |    |   |
|-------------|----|----|----|---|---|---|----|---|---|----|---|
| Woodard(37) | Y  | NA | Y  | N | N | Y | Y  | Y | N | N  | Y |
| Zwerink(38) | NA | NA | UC | Y | Y | Y | UC | Y | Y | UC | Y |

Y = yes; N = no; UC = unclear; NA = not applicable

**Table SV. Quality assessment – quasi-experimental studies.**

| <b>Study</b>    | <b>Clear<br/>'cause' &amp;<br/>'effect'</b> | <b>Participants<br/>similar</b> | <b>Participants<br/>receiving similar<br/>treatment other<br/>than intervention</b> | <b>Control<br/>group</b> | <b>Outcome<br/>measures pre-<br/>&amp; post-<br/>intervention</b> | <b>Follow up<br/>complete &amp;<br/>reasons why<br/>not</b> | <b>Outcomes<br/>measured in<br/>same way</b> | <b>Outcomes<br/>measured in<br/>a reliable<br/>way</b> | <b>Appropriate<br/>statistical<br/>analysis</b> |
|-----------------|---------------------------------------------|---------------------------------|-------------------------------------------------------------------------------------|--------------------------|-------------------------------------------------------------------|-------------------------------------------------------------|----------------------------------------------|--------------------------------------------------------|-------------------------------------------------|
| de<br>Groot(12) | Y                                           | Y                               | Y                                                                                   | N                        | Y                                                                 | Y                                                           | Y                                            | Y                                                      | Y                                               |

Y = yes; N = no

## Supplement References

1. Abdelbasset WK, Alqahtani BA, Alrawaili SM, Ahmed AS, Elnegamy TE, Ibrahim AA, et al. Similar effects of low to moderate-intensity exercise program vs moderate-intensity continuous exercise program on depressive disorder in heart failure patients. *Medicine* 2019; 98: e16820. DOI: 10.1097/MD.00000000000016820.
2. Abd El-Kader MS, Al-Jiffri O, Ashmawy EM. Impact of weight loss on markers of systemic inflammation in obese Saudi children with asthma. *Afr Health Sci* 2013; 13: 682-688. DOI: 10.4314/ahs.v13i3.23.
3. Al-Jiffri O, Al-Sharif FM, Abd El-Kader SM, Ashmawy EM. Weight reduction improves markers of hepatic function and insulin resistance in type-2 diabetic patients with non-alcoholic fatty liver. *Afr Health Sci* 2013; 13: 667-672. DOI: 10.4314/ahs.v13i3.21.
4. Barnes M, Goldsworthy UR, Cary BA, Hill CJ. A diet and exercise program to improve clinical outcomes in patients with obstructive sleep apnea - A feasibility study. *J Clin Sleep Med* 2009; 5: 409-415.
5. Beaudoin N, Bouvet GF, Coriati A, Rabasa-Lhoret R, Berthiaume Y. Combined exercise training improves glycemic control in adult with cystic fibrosis. *Med Sci Sports Exerc* 2017; 49: 231-237. DOI: 10.1249/MSS.0000000000001104.
6. Bernocchi P, Vitacca M, La Rovere MT, Volterrani M, Galli T, Baratti D, et al. Home-based telerehabilitation in older patients with chronic obstructive pulmonary disease and heart failure: A randomised controlled trial. *Age Ageing* 2018; 47: 82-88. DOI: 10.1093/ageing/afx146.
7. Byrkjeland R, Njerve IU, Anderssen S, Arnesen H, Seljeflot I, Solheim S. Effects of exercise training on HbA1c and VO<sub>2</sub>peak in patients with type 2 diabetes and coronary artery disease: A randomised clinical trial. *Diab Vasc Dis Res* 2015; 12: 325-333. DOI: 10.1177/1479164115590552.
8. Castro C, Gonzalez N, Oliveira M. Changing diabetic dialysis patients physical functioning with exercise training. *Nephrol Dial Transplant* 2015; 30: iii527-iii528.
9. Chiang S-L, Shen C-L, Chen L-C, Lo Y-P, Lin C-H, Lin C-H. Effectiveness of a home-based telehealth exercise training program for patients with cardiometabolic multimorbidity. *J Cardiovasc Nurs* 2020; 35: 491-501. DOI: 10.1097/JCN.0000000000000693.
10. Collins T, Lunos S. Home-based walking therapy improves walking ability and quality of life in persons with diabetes mellitus and peripheral arterial disease. *Vasc Med* 2010; 15: 155.
11. Crisafulli E, Gorgone P, Vagaggini B, Pagani M, Rossi G, Costa F, et al. Efficacy of standard rehabilitation in COPD outpatients with comorbidities. *Eur Respir J* 2010; 36: 1042-1048. DOI: 10.1183/09031936.00203809.
12. de Groot M, Doyle T, Kushnick M, Shubrook J, Merrill J, Rabideau E, et al. Can lifestyle interventions do more than reduce diabetes risk? Treating depression in adults with type 2 diabetes with

exercise and cognitive behavioral therapy. *Curr Diab Rep* 2012; 12: 157-166. DOI: 10.1007/s11892-012-0261-z.

13. Freitas PD, Silva AG, Ferreira PG, Carvalho CRF, Da Silva A, Salge JM, et al. Exercise improves physical activity and comorbidities in obese adults with asthma. *Med Sci Sports Exerc* 2018; 50: 1367-1376. DOI: 10.1249/MSS.0000000000001574.

14. Halvari H, Healey J, Olafsen AH, Byrkjeland R, Deci EL, Williams GC. Physical activity and motivational predictors of changes in health behavior and health among DM2 and CAD patients. *Scand J Med Sci Sports* 2017; 27: 1454-1469. DOI: 10.1111/sms.12757.

15. Hassan M, Mourad S, Abdel Wahab NH, Daabis R, Younis G. Effect of comorbidities on response to pulmonary rehabilitation in patients with chronic obstructive pulmonary disease. *Egyp J Chest Dis Tuberc* 2016; 65: 63-69. DOI.org/10.1016/j.ejcdt.2015.11.006.

16. Hsu Y-I, Chen Y-C, Lee C-L, Chang N-J. Effects of diet control and telemedicine-based resistance exercise intervention on patients with obesity and knee osteoarthritis: a randomised control trial. *Int J Environ Res Public Health* 2021; 18: 7744. DOI: 10.3390/ijerph18157744.

17. Johnson ST, Mundt C, Boule N, Bell G, Vallance J, Taylor L, et al. Improved functional status following the aquatic physical exercise for arthritis and diabetes (APEXD) study. *Can J Diab* 2014; 38: S63.

18. Khadanga S, Savage PD, Ades PA. Insulin resistance and diabetes mellitus in contemporary cardiac rehabilitation. *J Cardiopulm Rehabil Prev* 2016; 36: 331-338. DOI: 10.1097/HCR.000000000000187.

19. Kurian R, Gobejishvili L, Barve S, Mokshagundam SP. Effect of resistance training on cytokine responses in elderly subjects with peripheral neuropathy-effect of gender. *Proceedings of the 70th Scientific Sessions of the American Diabetes Association*. 2010 June 25-29; Orlando, United States of America.

20. Listerman J, Bittner V, Sanderson BK, Brown TM. Cardiac rehabilitation outcomes: impact of comorbidities and age. *J Cardiopulm Rehabil Prev* 2011; 31: 342-348. DOI: 10.1097/HCR.0b013e31822f189c.

21. Lo Y-P, Chiang S-L, Lin C-H, Liu H-C, Chiang L-C. Effects of individualised aerobic exercise training on physical activity and health-related physical fitness among middle-aged and older adults with multimorbidity: a randomised controlled trial. *Int J Environ Res Public Health* 2021; 18: 101. DOI: 10.3390/ijerph18010101.

22. Martin B, Hauer T, Austford LD, Arena R, Stone JA, Aggarwal S. Cardiac rehabilitation in subjects with peripheral arterial disease: A higher risk patient population who benefit from attendance. *Can J Cardiol* 2016; 134: A18122.

23. McNamara RJ, McKeough ZJ, McKenzie DK, Alison JA. Water-based exercise in COPD with physical comorbidities: a randomised controlled trial. *Eur Respir J* 2013; 41: 1284-1291. DOI: 10.1183/09031936.00034312.

24. Mentz RJ, Schulte PJ, Fleg JL, Fiuzat M, Kraus WE, Pina IL, et al. Clinical characteristics, response to exercise training, and outcomes in patients with heart failure and chronic obstructive pulmonary disease: findings from Heart Failure and A Controlled Trial Investigating Outcomes of Exercise Training (HF-ACTION). *Am Heart J* 2013; 165: 193-199. DOI: 10.1016/j.ahj.2012.10.029.
25. Mesquita R, Vanfleteren LE, Franssen FM, Sarv J, Taib Z, Groenen MT, et al. Objectively identified comorbidities in COPD: impact on pulmonary rehabilitation outcomes. *Eur Respir J* 2015; 46: 545-548. DOI: 10.1183/09031936.00026215.
26. Mundra V, Henquinet S, Moudry G. Outcomes of cardiac rehabilitation in obese patients. *Cardiol* 2013; 2: 482.
27. Naz I, Sahin H, Varol Y, Komurcuoglu B. The effect of comorbidity severity on pulmonary rehabilitation outcomes in chronic obstructive pulmonary disease patients. *Chron Respir Dis*. 2019; 16: 1479972318809472. DOI: 10.1177/1479972318809472.
28. Nonoyama ML, Marzolini S, Brooks D, Oh P. Comparison of cardiac rehabilitation outcomes in individuals with respiratory, cardiac or no comorbidities: A retrospective review. *Can J Respir Ther* 2016; 52: 43-49.
29. Servantes DM, Pelcerman A, Salvetti XM, Salles AF, de Albuquerque PF, de Salles FC, et al. Effects of home-based exercise training for patients with chronic heart failure and sleep apnoea: a randomized comparison of two different programmes. *Clin Rehabil* 2012; 26: 45-57. DOI: 10.1177/0269215511403941.
30. Soleimani A, Nejatian M, Hajizaynali MA, Abbasi SH, Alidoosti M, Sheikhfathollahi M, et al. Effect of gender and type 2 diabetes mellitus on heart rate recovery in patients with coronary artery disease after cardiac rehabilitation. *Endokrynol Pol* 2009; 60: 430-436.
31. Sridhar B, Haleagrahara N, Bhat R, Kulur AB, Avabratha S, Adhikary P. Increase in the heart rate variability with deep breathing in diabetic patients after 12-month exercise training. *Tohoku J Exp Med* 2010; 220: 107-113. DOI: 10.1620/tjem.220.107.
32. Srinivasan S, Reagan LP, Hardin JW, Matthews M, Leaphart E, Grillo CA, et al. Adjunctive tai chi in geriatric depression with comorbid arthritis: A randomized, controlled trial. *Am J Geriatr Psych* 2014; 22: S135-S136.
33. Takaya Y, Kumasaka R, Arakawa T, Ohara T, Nakanishi M, Noguchi T, et al. Impact of cardiac rehabilitation on renal function in patients with and without chronic kidney disease after acute myocardial infarction. *Circ J* 2014; 78: 377-384. DOI: 10.1253/circj.cj-13-0779.
34. Tunsupon P, Lal A, Khamis MA, Mador MJ. Comorbidities in patients with chronic obstructive pulmonary disease and pulmonary rehabilitation outcomes. *J Cardiopulm Rehabil Prev* 2017; 37: 283-289. DOI: 10.1097/HCR.0000000000000236.



35. Verges B, Patois-Verges B, Cohen M, Lucas B, Galland-Jos C, Casillas JM. Effects of cardiac rehabilitation on exercise capacity in Type 2 diabetic patients with coronary artery disease. *Diabet Med* 2004; 21: 889-895. DOI: 10.1111/j.1464-5491.2004.01262.x.
36. Wang JS, Fu TC, Lien HY, Wang CH, Hsu CC, Wu WC, et al. Effect of aerobic interval training on erythrocyte rheological and hemodynamic functions in heart failure patients with anemia. *Int J Cardiol* 2013; 168: 1243-1250. DOI: 10.1016/j.ijcard.2012.11.053.
37. Woodard CM, Berry MJ, Rejeski WJ, Ribisl PM, Miller HS. Exercise training in patients with cardiovascular disease and coexistent knee arthritis. *J Cardiopulm Rehabil* 1994; 14: 255-261.
38. Zwerink M, Van Der Meer S, Van Der Valk P, Van Der Palen J. Safety, feasibility and effectiveness of a community-based physiotherapy exercise program for patients with both copd and chronic heart failure a pilot study. *Am J Respir Crit Care Med* 2010; 181: A3452. DOI 10.1164/ajrcm-conference.2010.181.1.
